# Supplementary material
Source: publisher site journal article supplement (http://www.kjim.org/upload/media/kjim-2020-510-suppl2.pdf)
Supplement: Supplementary file 1 [file kjim-2020-510-suppl2.pdf]

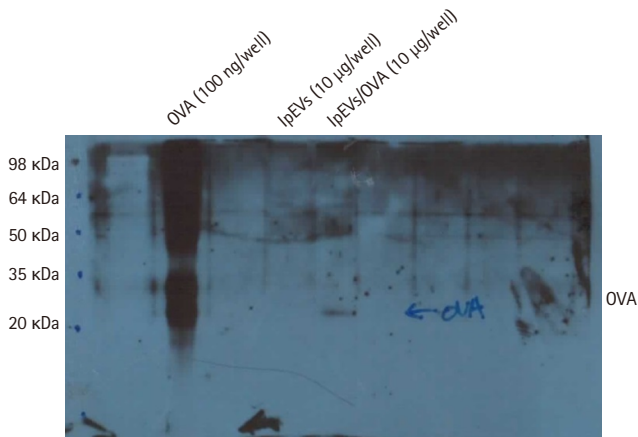

**Supplementary Figure 2.** Full length Western blotting assessment of the ovalbumin (OVA) levels in extracellular vehicles from small intestinal epithelial cells (IpEVs) or IpEVs/OVA, and positive control (OVA). The blot was scanned using a Samsung SCX-4623 device.
